# Supplementary material
Source: HighWire-hosted journal article supplement (http://www.jrheum.org/highwire/filestream/29790/field_highwire_adjunct_files/0/160275_Data_Suppl.pdf)
Supplement: 160275_Data_Suppl.pdf [file 160275_Data_Suppl.pdf]

**Supplementary Figure-1: ACR20 response rates through Week 52 in TNFi-naïve and TNFi-exposed patients**

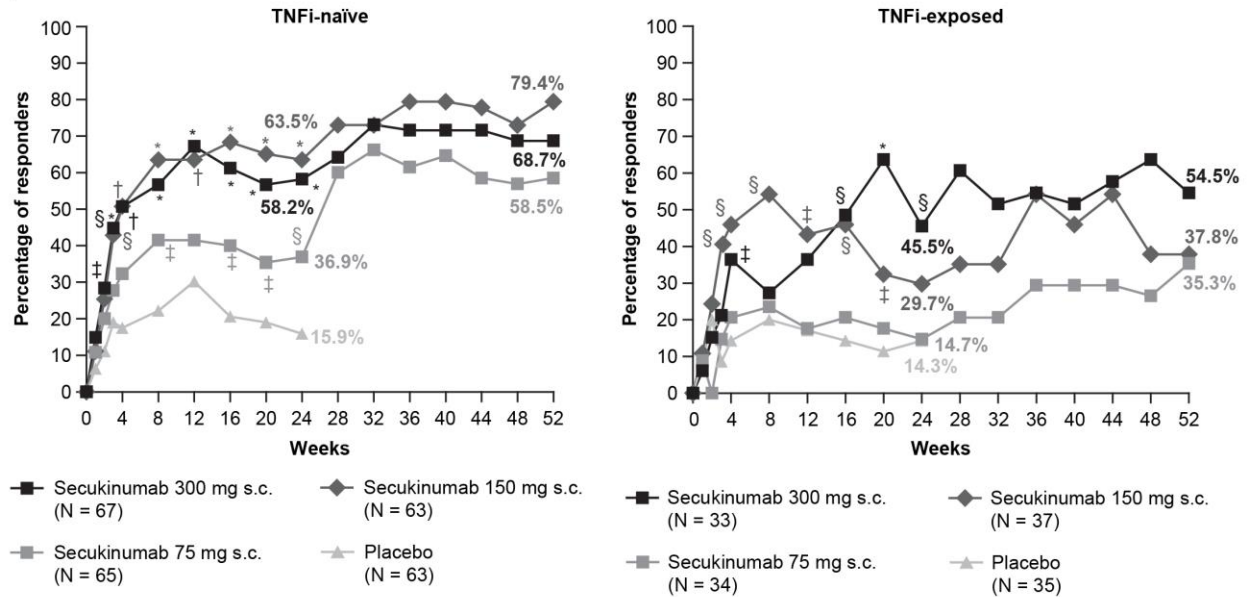

\* $P < 0.0001$ ; † $P < 0.001$ ; § $P < 0.01$ ; ‡ $P < 0.05$  vs. placebo

Missing values were imputed as non-response (non-responder imputation) at Weeks 24 and 52  
 ACR, American College of Rheumatology; s.c., subcutaneous; TNFi, tumor necrosis factor inhibitor

**Supplementary Figure-2: ACR20 response rates in TNFi-naïve and TNFi-exposed patients with or without concomitant MTX**

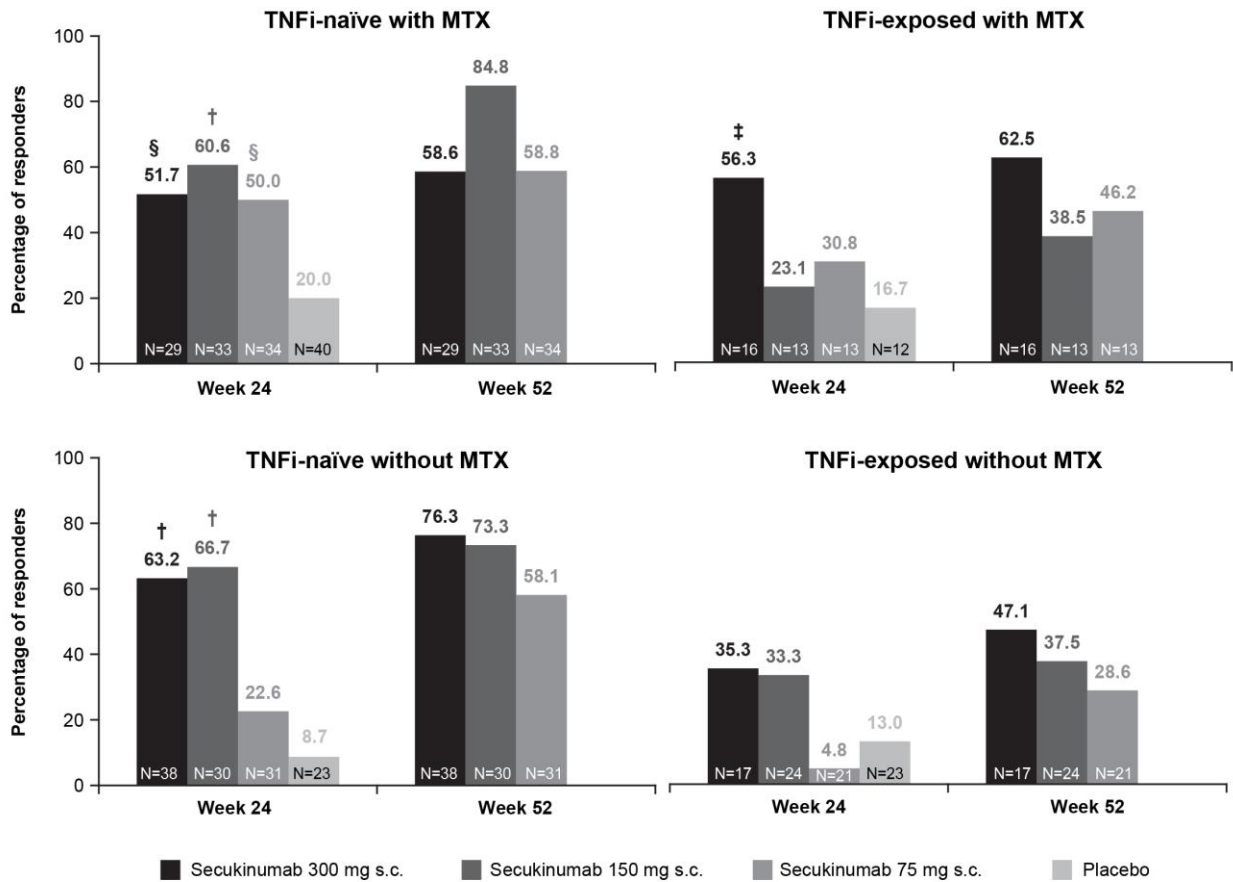

†P < 0.001; §P < 0.01; ‡P < 0.05 vs. placebo

Missing values were imputed as non-response (non-responder imputation) at Weeks 24 and 52

ACR, American College of Rheumatology; MTX, methotrexate; s.c., subcutaneous; TNFi, tumor necrosis factor inhibitor

**Supplementary Figure-3: ACR20 response rates in TNFi-naïve and TNFi-exposed patients stratified by body weight**

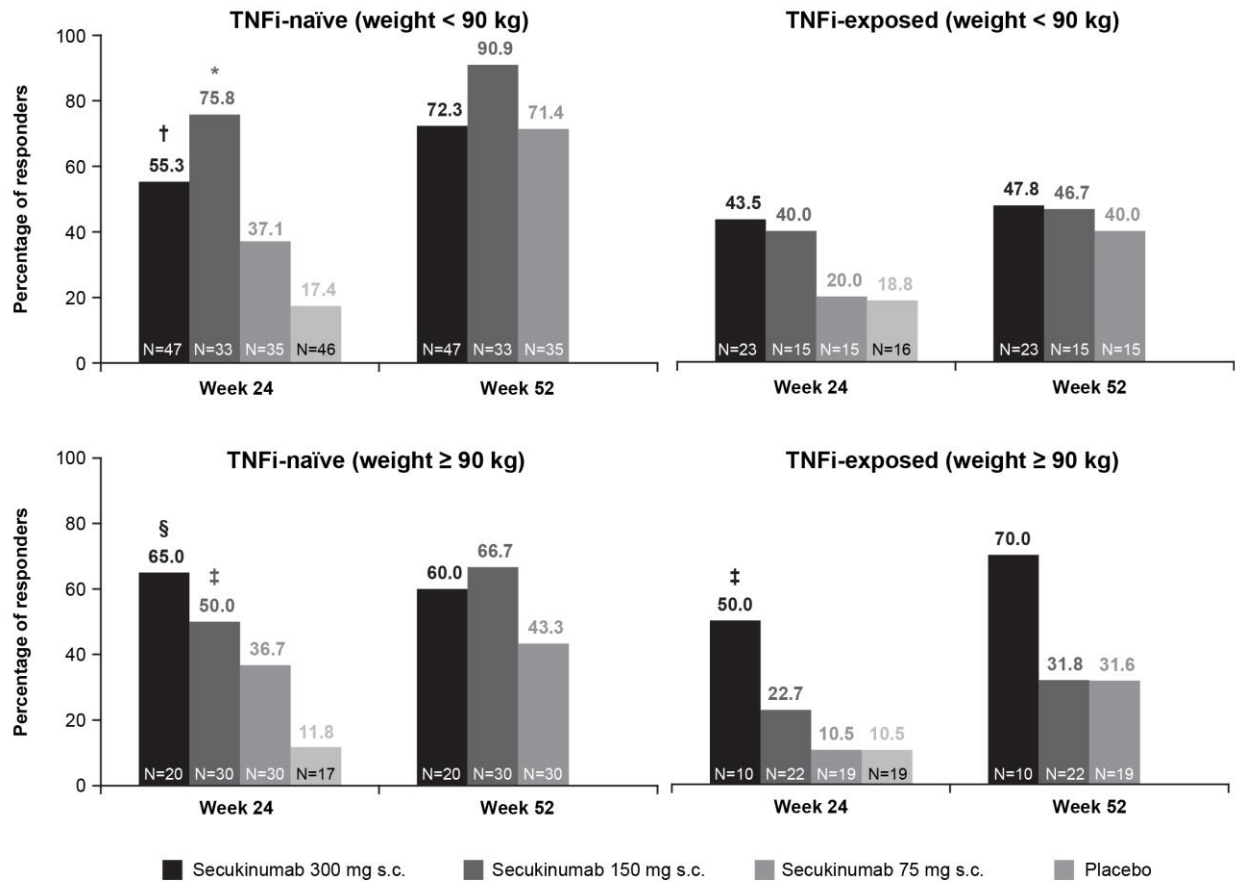

\*P < 0.0001; †P < 0.001; §P < 0.01; ‡P < 0.05 vs. placebo  
 Missing values were imputed as non-response (non-responder imputation) at Weeks 24 and 52  
 ACR, American College of Rheumatology; s.c., subcutaneous; TNFi, tumor necrosis factor inhibitor

**Supplementary Figure-4: ACR20 response rates in TNFi-naïve and TNFi-exposed patients stratified by baseline disease activity**

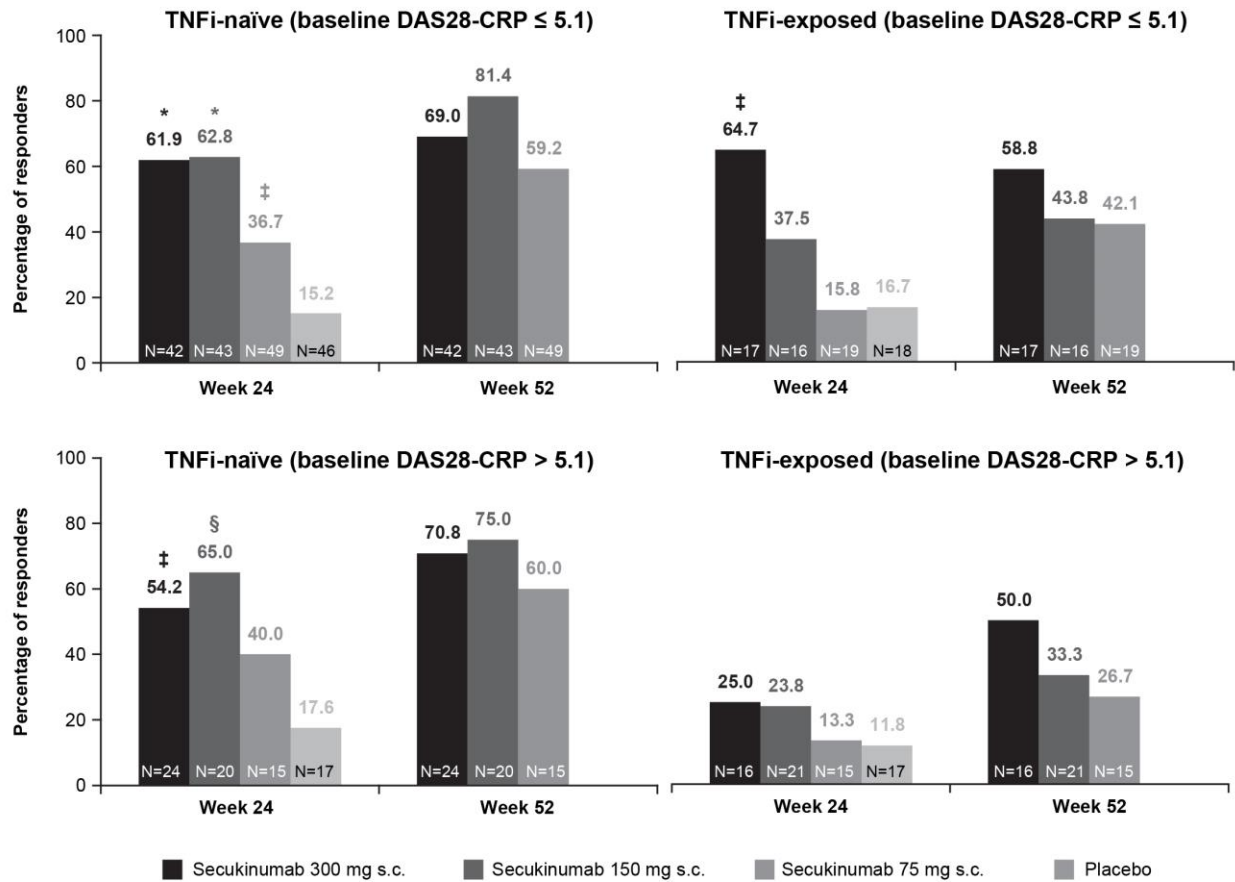

\* $P < 0.0001$ ; § $P < 0.01$ ; ‡ $P < 0.05$  vs. placebo

Missing values were imputed as non-response (non-responder imputation) at Weeks 24 and 52

ACR, American College of Rheumatology; DAS28-CRP, 28-joint Disease Activity Score using C-Reactive Protein; s.c., subcutaneous; TNFi, tumor necrosis factor inhibitor
